# Supplementary material for: Role of tRNA amino acid-accepting end in aminoacylation and its quality control
Source: PubMed Central journal article supplement — Nucleic Acids Res. 2011 Jul 20;39(20):8857–68. doi: 10.1093/nar/gkr595 (PMC3203616; doi:10.1093/nar/gkr595), 2011-07-20
Supplement: supp_gkr595_Supplementary_Figures.pdf [file supp_gkr595_Supplementary_Figures.pdf]

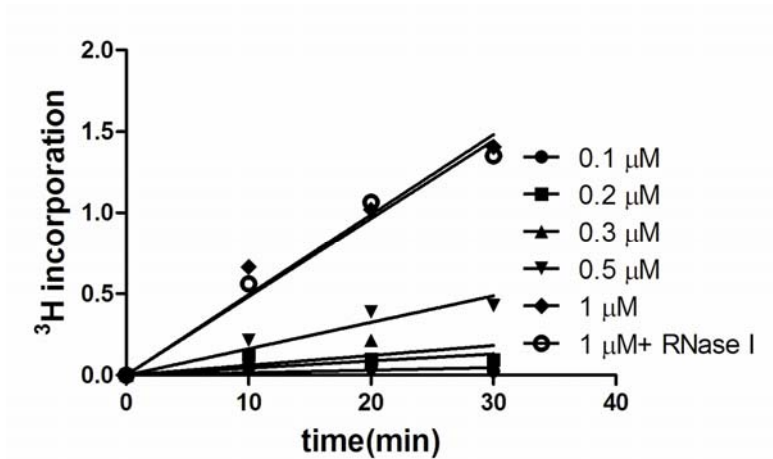

**Supplementary Figure 1**

**Supplementary Figure 1: Self-aminoacylation of *EcLeuRS*.**

Self-aminoacylation of *EcLeuRS* was performed in the absence of tRNA. The self-aminoacylation reaction was carried out in the reaction solution containing 100 mM Tris-HCl (pH 7.8), 30 mM KCl, 12 mM MgCl<sub>2</sub>, 0.5 mM dithiothreitol, 4 mM ATP, 20 μM [<sup>3</sup>H]leucine (15 Ci/mmol) and different concentrations of *EcLeuRS* at 37 °C. RNase I (final 0.25 U/μl) was added to the 1 μM *EcLeuRS* reaction mixture. At specific times, aliquots of the reaction solution were removed and quenched on Whatman filter pads, and equilibrated with cold 5% TCA. The pads were sequentially washed with 5% TCA 3 times and with 100% ethanol 3 times. The filter pads were dried, and the radioactivities of the precipitates were quantified using a scintillation counter.

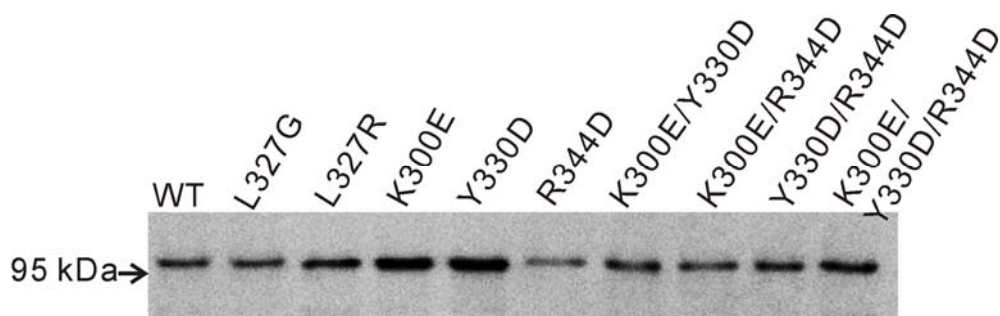

**Supplementary Figure 2**

**Supplementary Figure 2: Western blot analysis of the expression of *EcLeuRS* and its mutants in KL231.**

KL231 cells containing the genes encoding the wild-type (WT) and mutated *EcLeuRS*s were grown at 42°C overnight. The cells were harvested by centrifugation, lysed by sonication, and cell debris removed by centrifugation. Equal amounts of the protein-containing supernatants (30 µg) were electrophoretically separated on 10% SDS-PAGE and transferred onto a polyvinylidene difluoride membrane (NEN Research Products, Boston, MA). The membrane was blocked with 5% non-fat dry milk in PBST (1×PBS plus 0.5% Tween-20) and incubated with a 1:2000 dilution of anti-His<sub>6</sub> antibody at room temperature for 2 hours. Subsequently, a 1:5000 dilution of the secondary goat-anti-mouse IgG was added and incubated at room temperature for 2 hours. The bound antibody was visualized by adding the Western Lightning horseradish peroxidase chemiluminescence solution (Perkin-Elmer) and exposing to Fujifilm LAS-4000 (FUJIFILM Life Science).
